# Supplementary material
Source: PubMed Central journal article supplement (PMC6869149)
Supplement: HBM-36-3441-s001.pdf [file HBM-36-3441-s001.pdf]

## 1 **Supplementary materials**

### 2 **I. NTU-DSI-122 DSI template**

3 We previously developed a DSI template, NTU-DSI-122, in the standard  
4 ICBM152 space (available at <https://www.nitrc.org/projects/ntu-dsi-122>). This  
5 template was built through a novel two-step registration strategy, which incorporated  
6 both the macroscopic anatomical information using high-resolution T1W images and  
7 the microscopic structural information obtained from DSI datasets. Briefly, in the first  
8 step, an intermediate DSI template was constructed in the ICBM152 space by  
9 averaging the temporarily registered DSI datasets using deformation maps estimated  
10 through T1W images; in the second step, the temporarily registered DSI datasets were  
11 further registered to the intermediate DSI template using the LDDMM-DSI algorithm  
12 (Hsu et al., 2012), yielding the final registered DSI datasets. The NTU-DSI-122  
13 template was constructed by averaging the final registered DSI datasets. Therefore,  
14 one can consider the first step as a transformation emphasizing on conforming brain  
15 morphology to the ICBM152 space, and the second step as a transformation  
16 emphasizing the q-space signals convergent across subjects (Hsu et al., 2014). By  
17 using this two-step registration strategy, NTU-DSI-122 showed high anatomical  
18 consistency in matching to the standard ICBM152 template. The final template was  
19 the average of 122 registered DSI datasets from healthy adults. In addition to the high

1  
2  
3  
4 1 signal-to-noise ratio of the template, it had several unique qualities. (1) All the  
5  
6  
7 2 datasets were acquired on a 3T MRI machine with a 32 channel phased arrayed head  
8  
9  
10 3 coil at isotropic spatial resolution of  $2.5 \times 2.5 \times 2.5 \text{ mm}^3$ . (2) All the datasets passed  
11  
12 4 the quality assurance to ensure that the head motion-induced signal dropout was lower  
13  
14  
15 5 than 3 images out of 5508 images in total for each subject. (3) Susceptibility-induced  
16  
17  
18 6 distortion was corrected for all the datasets using the field maps (Hsu et al., 2009). (4)  
19  
20  
21 7 An advanced two-step registration procedure was used to ensure high consistency in  
22  
23  
24 8 both brain anatomy and q-space signals.  
25  
26  
27  
28  
29  
30  
31  
32  
33  
34  
35  
36  
37  
38  
39  
40  
41  
42  
43  
44  
45  
46  
47  
48  
49  
50  
51  
52  
53  
54  
55  
56  
57  
58  
59  
60

## 1 II. *Tractography procedures*

2           The voxels with GFA values greater than a given threshold of 0.05, which was  
3 two standard deviations above the mean GFA values of the gray matter, were selected  
4 as the white matter regions and were used as seed voxels for tractography over the  
5 whole brain. Consistent with previous reports, the GFA value derived from HARDI  
6 data was mostly linear with but lower than the FA value derived from DTI (Fritzsche et  
7 al., 2010; Gorczewski et al., 2009), and our threshold value of 0.05 for white matter  
8 masking was comparable with the GFA value of 0.05 used by (Berman et al., 2008)  
9 based on HARDI data. For each seed voxel, the proceeding orientation for the next step  
10 was decided by the angular deviation between the primary orientation within the seed  
11 voxel and all of the fiber orientations of its nearest voxels; the most coincident  
12 orientation with the minimum angular deviation was chosen. The range of the angle  
13 thresholds for the 76 long tract bundles was from 28° to 40°. The new starting point was  
14 obtained by moving the seed point with a proceeding length of one voxel (1 mm) for  
15 each step along the most coincident orientation. When the angle deviations were greater  
16 than a given angular threshold, the tracking would stop. To ensure the accuracy of the  
17 tractography, only the tracts with lengths falling between 37.5 mm and 173.8 mm  
18 (mean: 70.4 mm; median: 62.5 mm) were selected, and a range of tract numbers from  
19 100 to 500 was required for each tract bundle.

### 1 III. Threshold-Free Cluster Enhancement

2 Because the GFA values sampled along a tract bundle are derived from a  
3 continuous function, the magnitude of differences between groups in each measured  
4 step should have spatial contiguity along a tract. We used TFCE to improve the  
5 statistical power and exploited spatially extended differences. TFCE reweighted each  
6 data point (e.g., voxel) of a statistical image with its own magnitude and neighboring  
7 supportive segments (Smith and Nichols, 2009). The TFCE output at data point  $p$  was

$$9 \quad TFCE(p) = \int_{h=h_0}^{h_p} e(h)^E h^H dh$$

10  
11 where  $h_p$  was the statistical magnitude (e.g.,  $t$  statistic) at a given point  $p$ . As  $h$  varied  
12 between height zero,  $h_0$ , to  $h_p$ , the cluster extent that survived at the given threshold  $h$   
13 was  $e$ . The predetermined parameters,  $E$  and  $H$ , assigned weights to the cluster extent  
14 and statistical magnitude, respectively. TFCE was the sum of the products from a  
15 height of zero,  $h_0$ , to  $h_p$ .

16 In the original paper of TFCE (Smith and Nichols, 2009),  $H = 2$  was suggested  
17 for the  $t$ -statistic image and  $E = 0.5$  was suggested for the three dimensional data. In  
18 our TBAA method, the dimensionality of statistical images was reduced to 1D.  
19 Therefore, the parameter  $E$  had to be modified. Based on our simulation for 1D data,

1  
2  
3  
4 the parameter E was chosen to be 2.  
5  
6

7 2  
8  
9

10 3 *Controlling for the FWER*  
11

12 A permutation test based on a TFCE-weighted statistical image was used for  
13 statistical inference (Smith and Nichols, 2009). A maximal statistic approach was used  
14  
15 to control the FWER (Nichols and Hayasaka, 2003). For each permutation, subjects  
16  
17 were randomly assigned into two groups and the largest TFCE weighted statistic  
18  
19 among the images was derived. After 5000 permutations, the results approximated a  
20  
21 cumulative density function of maximal TFCE statistic, which was used to calculate  
22  
23 the FWER adjusted p values.  
24  
25  
26  
27  
28  
29  
30  
31  
32  
33  
34  
35  
36  
37  
38  
39  
40  
41  
42  
43  
44  
45  
46  
47  
48  
49  
50  
51  
52  
53  
54  
55  
56  
57  
58  
59  
60
